# Supplementary figures and images for: SOD1 silencing in motoneurons or glia rescues neuromuscular function in ALS mice
Source: PubMed Central journal article supplement — Ann Clin Transl Neurol. 2015 Jan 15;2(2):167–84. doi: 10.1002/acn3.162 (PMC4338957; doi:10.1002/acn3.162), 2015-01-15

# Supplementary Figure 1

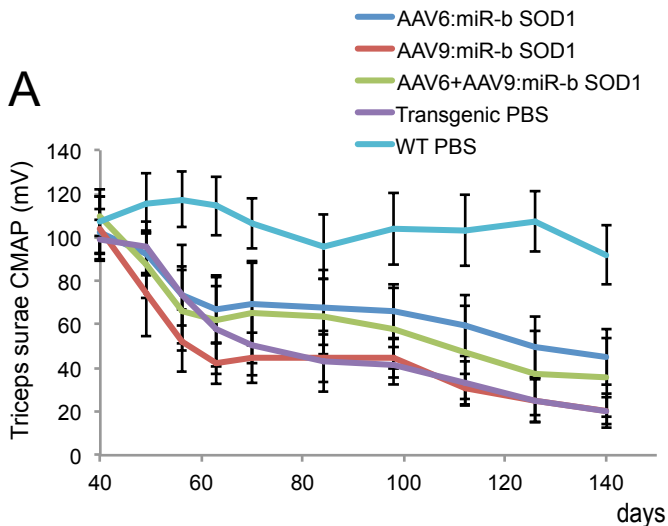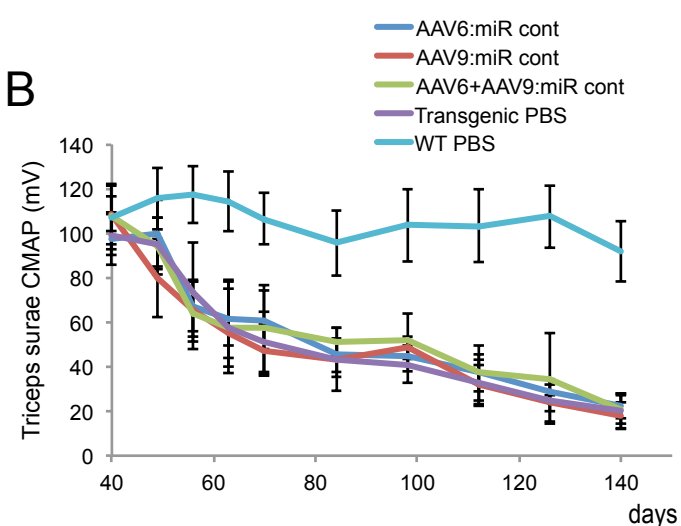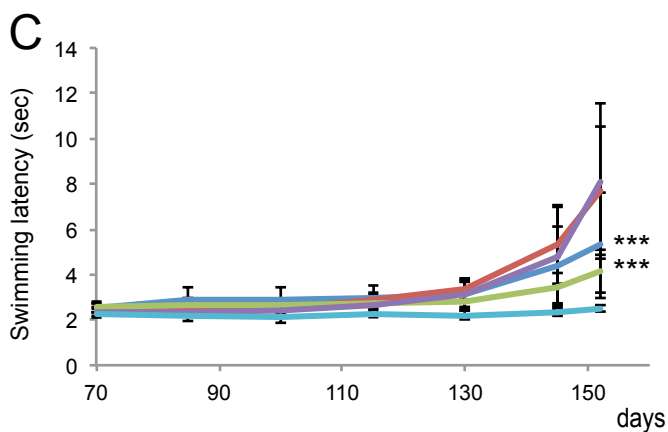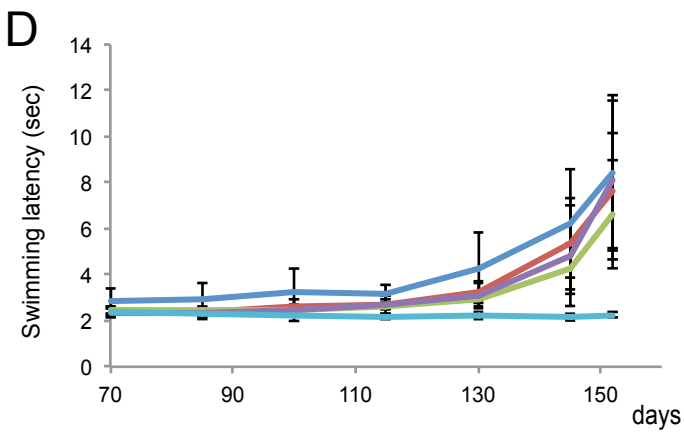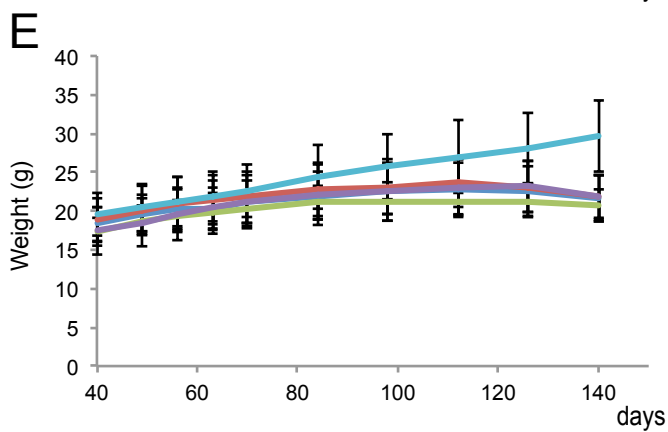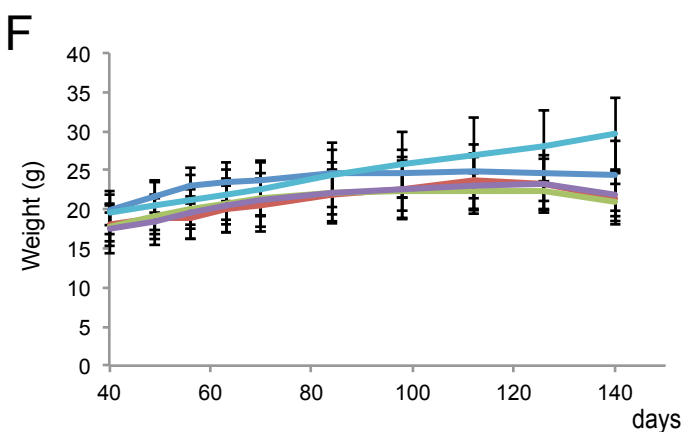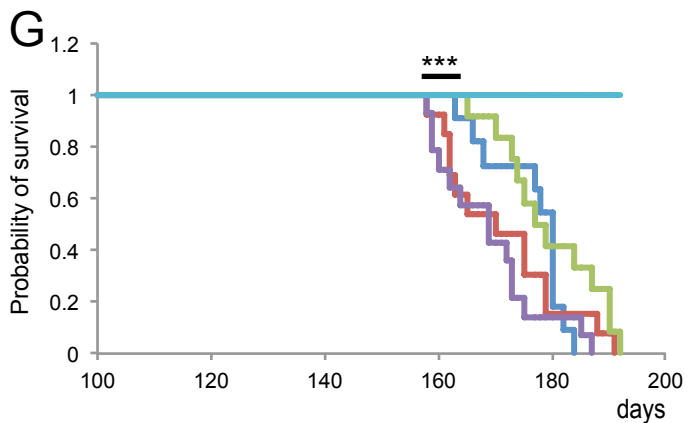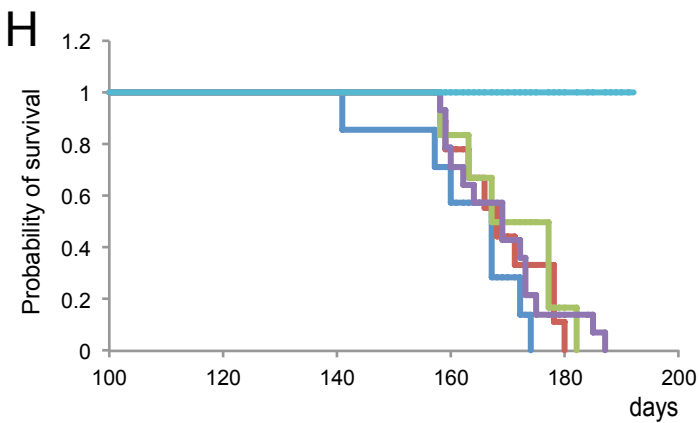

Supplement: acn30002-0167-sd1.pdf [file acn30002-0167-sd1.pdf]
